# Supplementary material for: Improved Assessment of Response Status in Patients with Pancreatic Cancer Treated with Neoadjuvant Therapy using Somatic Mutations and Liquid Biopsy Analysis
Source: Oxford University Press journal article supplement (doi:10.1158/1078-0432.ccr-20-1746), 2020-10-20
Supplement: 10780432ccr201746-sup-242760_3_supp_6641220_qh3gh8_r.xlsx [file 10780432ccr201746-sup-242760_3_supp_6641220_qh3gh8_r.xlsx]

## Sheet: Table S1
Table S1. Demographics of patients with pCR
Variables	PDAC patients with pCR (n=36)
Male, n(%)	21 (58.3%)
Age, years
Mean (SD)	61.4 (9.6)
Stage
Borderline	11 (30.6%)
LAPC	23 (63.9%)
Metastatic	2 (5.6%)
Neoadjuvant Chemotherapy
Gemcitabine-based	4 (11.1%)
Forfirinox	12 (33.3%)
Xeloda	2 (5.6%)
Multi-agent	18 (50.0%)
Neoadjuvant radiation therapy
No radiation	2 (5.6%)
SBRT	16 (44.4%)
IMRT/EBRT	18 (50.0%)
Radiological response	16 (44.4%)
Type of operation
PD	29 (80.6%)
DP	6 (20%)
TP	1 (3.3%)
Length of hospital stay
Median (IQR)	7.5 (6.0-10.8)
Clavien-dindo grade
I-II	28 (77.8%)
III-V	8 (22.2%)
90 days mortality	1 (2.8%)
PanIN
0	5 (13.9%)
1	9 (25.0%)
2	14 (38.9%)
3	8 (22.2%)
Cancerization	2 (5.6%)
Abbreviations: SD, standard deviation. LAPC, locally advanced pancreatic cancer. SBRT, stereotactic body radiation therapy. IMRT, intensity modulated radiation therapy. EBRT, external beam radiotherapy. NAT, neoadjuvant therapy. IQR, interquartile range. PD, pancreaticoduodenectomy. DP, distal pancreatectomy. TP, total pancreatectomy

## Sheet: Table S2
Table S2. Univariable Cox regression analysis of survival in patients with pCR who underwent neoadjuvant therapy
Clinical Characteristics	Cohort (n=30)	OS post-diagnosis	DFS post-diagnosis	OS post-surgery	DFS post-surgery
		Univariable P Value	Univariable P Value	Univariable P Value	Univariable P Value
Age, n (%)
<60 years	13 (43.3%)	Ref	Ref	Ref	Ref
≥60 years	17 (56.7%)	0.484	0.12	0.488	0.156
Gender, n (%)
Male	18 (60.0%)	Ref	Ref	Ref	Ref
Female	12 (40.0%)	0.349	0.789	0.301	0.947
Stage
Borderline	9 (30.0%)	Ref	Ref	Ref	Ref
Locally advanced or metastatic	21 (70.0%)	0.599	0.241	0.871	0.288
Chemotherapy regimen, n (%)
Other	19 (63.3%)	Ref	Ref	Ref	Ref
Folfirinox	11 (36.7%)	0.314	0.314	0.307	0.41
Radiation modality, n (%)
SBRT	15 (50.0%)	Ref	Ref	Ref	Ref
IMRT/EBRT or no radiation	15 (50.0%)	0.357	0.605	0.395	0.555
Radiological response
No	19 (63.3%)	Ref	Ref	Ref	Ref
Yes	11 (36.7%)	0.683	0.131	0.731	0.106
PanIN
0/I	11 (36.7%)	Ref	Ref	Ref	Ref
II/III	19 (63.3%)	0.63	0.725	0.707	0.642
Adjuvant therapy
No	13 (44.8%)	Ref	Ref	Ref	Ref
Yes	16 (55.2%)	0.197	0.009	0.234	0.012

## Sheet: Table S3
Table S3. Sample availability and clinical characteristics of 36 pCR patients
Case #	Gender	Age (y)	Stage	Surgery Type	LOS (d)	90 days mortality	Neoadjuvant Chemotherapy	Neoadjuvant radiation therapy	Ajuvant therapy	Recurrence site	Blocks picked	Sample number of normal parenchyma	Sample number of normal duct	Sample number of precursor lesion	Sample number of fibrosis	Cancerization	With CTCs data	With ctDNA data
PC-pCR-001	Female	64.8932	LAPC	DP	6	0	Multi	IMRT/EBRT	No	No recurrence	2	0	0	0	6	No	No	No
PC-pCR-002	Male	67	LAPC	PD	7	0	Multi	SBRT	Yes	Carcinomatosis	6	2	0	13	5	No	No	No
PC-pCR-003	Female	56	Borderline	DP	22	0	Multi	IMRT/EBRT	No	No recurrence	3	1	0	0	7	No	No	Yes
PC-pCR-004	Female	74.4219	Borderline	PD	7	0	Xeloda	IMRT/EBRT	Yes	Local, carcinomatosis and lung	4	2	0	1	5	No	No	No
PC-pCR-005	Male	53.0384	LAPC	PD	11	0	Gem	SBRT	Yes	Local and carcinomatosis	4	1	2	10	1	No	No	No
PC-pCR-006	Female	73.7288	LAPC	PD	15	0	Multi	IMRT/EBRT	Yes	Local and liver	4	0	3	11	2	Yes	No	No
PC-pCR-007	Male	63.9863	LAPC	PD	9	0	Folfirinox	IMRT/EBRT	Yes	No recurrence	3	0	0	3	7	No	No	No
PC-pCR-008	Female	66.2493	LAPC	PD	6	0	Folfirinox	IMRT/EBRT	Yes	Lung	6	1	1	8	17	No	No	No
PC-pCR-009	Male	70	Borderline	PD	12	1	Folfirinox	SBRT	None, died of post-operative bleeding	/	4	1	0	4	8	No	No	Yes
PC-pCR-010	Male	68	Borderline	PD	9	0	Multi	SBRT	No	No recurrence	1	1	0	0	3	No	No	No
PC-pCR-011	Male	69.5014	Borderline	PD	5	0	Folfirinox	SBRT	Yes	Liver	5	2	0	5	6	No	No	Yes
PC-pCR-012	Male	53.7342	LAPC	DP	4	0	Xeloda	IMRT/EBRT	No	No recurrence	3	0	0	5	10	No	No	No
PC-pCR-013	Male	74.0849	LAPC	PD	10	0	Folfirinox	SBRT	No	No recurrence	4	0	0	4	7	No	No	Yes
PC-pCR-014	Female	49.6027	Borderline	TP	11	0	Folfirinox	SBRT	Yes	Local	4	0	0	0	10	No	No	No
PC-pCR-015	Female	58.4384	LAPC	PD	8	0	Folfirinox	SBRT	Yes	Local	3	2	0	2	2	Yes	No	Yes
PC-pCR-016	Male	57.8712	Borderline	PD	7	0	Folfirinox	SBRT	Yes	Liver	7	2	0	2	19	No	No	Yes
PC-pCR-017	Female	67.9945	LAPC	PD	8	0	Folfirinox	SBRT	Yes	No recurrence	3	1	0	9	6	No	Yes	Yes
PC-pCR-018	Male	48	Borderline	PD	16	0	Folfirinox	SBRT	Yes	Local	3	0	0	0	7	No	Yes	Yes
PC-pCR-019	Female	63.2849	LAPC	PD	8	0	Folfirinox	No radiation	No	No recurrence	3	1	0	3	7	No	Yes	Yes
PC-pCR-020	Male	38	LAPC	PD	8	0	Folfirinox	SBRT	No	Carcinomatosis	2	1	0	0	5	No	Yes	Yes
PC-pCR-021	Male	57.6932	LAPC	PD	7	0	Multi	IMRT/EBRT	No	No recurrence	4	0	0	0	10	No	No	Yes
PC-pCR-022	Male	67	LAPC	DP	6	0	Folfirinox	SBRT	No	No recurrence	4	0	0	2	16	No	Yes	Yes
PC-pCR-023	Male	60	LAPC	PD	7	0	Folfirinox	SBRT	No	No recurrence	4	5	2	3	12	No	No	Yes
PC-pCR-024	Male	61	Borderline	PD	6	0	Folfirinox	IMRT/EBRT	No	Local	4	0	0	4	11	No	No	Yes
PC-pCR-025	Male	74	LAPC	PD	14	0	Multi	SBRT	No	No recurrence	4	2	1	14	0	No	No	Yes
PC-pCR-026	Male	67	Metastatic	DP	5	0	Multi	No radiation	Yes	No recurrence	3	2	0	1	3	No	No	Yes
PC-pCR-027	Male	59.2959	LAPC	DP	6	0	Multi	SBRT	Yes	Liver	NA	NA	NA	NA	NA	No	No	No
PC-pCR-028	Male	45.4849	Metastatic	PD	8	0	Multi	IMRT/EBRT	Yes	Liver	NA	NA	NA	NA	NA	No	No	No
PC-pCR-029	Female	49	Borderline	PD	6	0	Multi	IMRT/EBRT	No	Lung, distal pancreas	NA	NA	NA	NA	NA	No	No	No
PC-pCR-030	Female	67	LAPC	PD	7	0	Folfirinox	IMRT/EBRT	No	No recurrence	NA	NA	NA	NA	NA	No	No	No
PC-pCR-031	Female	53	LAPC	PD	7	NA	Gem	IMRT/EBRT	NA	NA	NA	NA	NA	NA	NA	No	No	No
PC-pCR-032	Male	76	LAPC	PD	19	NA	Multi	IMRT/EBRT	NA	NA	NA	NA	NA	NA	NA	No	No	No
PC-pCR-033	Female	74	LAPC	PD	6	NA	Gem	IMRT/EBRT	NA	NA	NA	NA	NA	NA	NA	No	No	No
PC-pCR-034	Female	60	LAPC	PD	17	NA	Multi	IMRT/EBRT	NA	NA	NA	NA	NA	NA	NA	No	No	No
PC-pCR-035	Male	55	Borderline	PD	6	NA	Gem	IMRT/EBRT	NA	NA	NA	NA	NA	NA	NA	No	No	No
PC-pCR-036	Female	46	LAPC	PD	10	0	Forfirinox	IMRT/EBRT	No	No recurrence	NA	NA	NA	NA	NA	No	No	No

## Sheet: Table S4
Table S4. Somatic mutations in resected specimens, ctDNA and CTC detected at surgery
Case #	Somatic Mutant DNA Detected in Resected Specimen*	CTC Number at Surgery**	ctDNA Detected at Surgery*
PC-pCR-001	Yes	/	/
PC-pCR-002	Yes	/	/
PC-pCR-003	Yes	/	No
PC-pCR-004	No	/	/
PC-pCR-005	Yes	/	/
PC-pCR-006	Yes	/	/
PC-pCR-007	Yes	/	/
PC-pCR-008	Yes	/	/
PC-pCR-009	Yes	/	No
PC-pCR-010	No	/	/
PC-pCR-011	Yes	/	Yes
PC-pCR-012	No	/	/
PC-pCR-013	No	/	No
PC-pCR-014	No	/	/
PC-pCR-015	Yes	/	Yes
PC-pCR-016	No	/	No
PC-pCR-017	No	11	Yes
PC-pCR-018	No	10	No
PC-pCR-019	No	5	Yes
PC-pCR-020	No	3	No
PC-pCR-021	No	/	No
PC-pCR-022	Yes	8	No
PC-pCR-023	No	/	No
PC-pCR-024	No	/	Yes
PC-pCR-025	Yes	/	Yes
PC-pCR-026	No	/	Yes
*, Any mutation will be counted as Yes
**, Total number of (PanCK+/CD45- and PanCK+/Vim+/CD45-) cells

## Sheet: Table S5
Table S5. Details of ctDNA detected at surgery
Case#ID	cfDNA hGE /ml Plasma	Kras mt	Kras mt hGE /ml Plasma	TP53	TP53 mt hGE /ml Plasma	Total mt hGE /ml Plasma
PC-pCR-001	N.A	/	/	/	/	/
PC-pCR-002	N.A	/	/	/	/	/
PC-pCR-003	2327	/	/	/	/	/
PC-pCR-004	N.A	/	/	/	/	/
PC-pCR-005	N.A	/	/	/	/	/
PC-pCR-006	N.A	/	/	/	/	/
PC-pCR-007	N.A	/	/	/	/	/
PC-pCR-008	N.A	/	/	/	/	/
PC-pCR-009	7669	/	/	/	/	/
PC-pCR-010	N.A	/	/	/	/	/
PC-pCR-011	2073	p.G12D	1	/	/	1
PC-pCR-012	N.A	/	/	/	/	/
PC-pCR-013	15294	/	/	/	/	/
PC-pCR-014	N.A	/	/	/	/	/
PC-pCR-015	12364	p.G12D	7	/	/	7
PC-pCR-016	5564	/	/	/	/	/
PC-pCR-017	14735	/	/	p.R181H	234	234
PC-pCR-018	22160	/	/	/	/	/
PC-pCR-019	17551	p.G12D	18	/	/	18
PC-pCR-020	6589	/	/	/	/	/
PC-pCR-021	29971	/	/	/	/	/
PC-pCR-022	9553	/	/	/	/	/
PC-pCR-023	1412	/	/	/	/	/
PC-pCR-024	7089	p.G12D	5	/	/	5
PC-pCR-025	6414	p.G12D	6	/	/	6
PC-pCR-026	24385	p.G12D	27	/	/	27

## Sheet: Table S6
Table S6. Demographics of mCR and pCR only patients
Variable	PDAC patients with mCR (n=6)	PDAC patients with only pCR (n=15)	p Valuable
Male	6	8	0.061
Age, years
Mean (SD)	56.0 (±12.1)	64.9 (±6.0)	0.035
Stage			0.688
Borderline	2	3
LAPC	4	11
Metastatic	0	1
Neoadjuvant Chemotherapy			0.675
Gemcitabine-based	0	1
Forfirinox	3	5
Multi-agent	3	9
Neoadjuvant radiation therapy			0.285
No radiation	0	2
SBRT	5	7
IMRT/EBRT	1	6
Time of NAT administered, days
Median (IQR)	191 (148-272)	243 (153-548)	0.064
Radiological response	1	5	0.623
Type of operation			0.281
PD	6	11
DP	0	4
Ajuvant therapy			0.361
Yes	2	9
No	4	6
Recurrence	3	6	1
Follow-up, months			0.391
Median (IQR)	39.4 (±5.57)	49.5 (±27.7)

## Sheet: Table S7
Table S7. Demographics of patients with or wihout mutant UDC
Variable	PDAC patients with mutant UDC (n=10)	PDAC patients without mutant UDC (n=8)	p Valuable
Male	7	5	1
Age, years
Mean (SD)	66.0 (±6.5)	64.0 (7.3)	0.55
Stage
Borderline	1	3	0.286
LAPC	8	5
Metastatic	1	0
Neoadjuvant Chemotherapy			0.098
Gemcitabine-based	1	0
Forfirinox	2	4
Xeloda	0	2
Multi-agent	7	2
Neoadjuvant radiation therapy			0.914
No radiation	1	1
SBRT	6	4
IMRT/EBRT	3	3
Time of NAT administered, days
Median (SD)	272 (±175.4)	353.6 (±240.8)	0.417
Radiological response	3	4	0.63
Type of operation			1
PD	8	7
DP	2	1
Ajuvant therapy			0.145
Yes	2	5
No	8	3
Recurrence	6	3	0.637
Follow-up, months
Median (SD)	35.9 (±18.8)	29.6 (±11.6)	0.417

## Sheet: Table S8
Table S8. Predictors of survival of pCR patients based on clinical characteristics and muations in resected specimens.
Characteristics	Cohort (n=25)	OS post-diagnosis			DFS post-diagnosis			OS post-surgery			DFS post-surgery
		HR	95% CI	Univariable P Value	HR	95% CI	Univariable P Value	HR	95% CI	Univariable P Value	HR	95% CI	Univariable P Value
Age, median (range)	64 (38-74)	0.909	0.833-0.993	0.034	0.946	0.884-1.012	0.108	0.925	0.850-1.006	0.068	0.953	0.891-1.020	0.165
Gender, n (%)
Male	16 (64%)	Ref			Ref			Ref			Ref
Female	9 (36%)	2.031	0.561-7.361	0.281	1.558	0.489-4.964	0.453	2.219	0.616-7.991	0.223	1.434	0.454-4.532	0.54
Stage
Borderline	8 (32%)	Ref			Ref			Ref			Ref
Locally advanced or metastatic	17 (68%)	0.685	0.191-2.458	0.562	0.487	0.156-1.516	0.214	0.889	0.249-3.167	0.856	0.528	0.169-1.653	0.273
Radiation modality, n (%)
SBRT	14 (56%)	Ref			Ref			Ref			Ref
IMRT/EBRT or no radiation	11 (44%)	0.709	0.194-2.585	0.602	0.763	0.227-2.558	0.661	0.705	0.196-2.533	0.592	0.711	0.213-2.371	0.579
Chemotherapy regimen, n (%)
Other	16 (64%)	Ref			Ref			Ref			Ref
FOLFIRINOX	9 (36%)	2.042	0.508-8.200	0.314	2.869	0.905-9.091	0.073	1.772	0.469-6.697	0.399	1.568	0.450-5.470	0.076
Radiological response
No	17 (68%)	Ref			Ref			Ref			Ref
Yes	8 (32%)	2.257	0.505-10.083	0.287	1.796	0.503-6.408	0.367	1.837	0.436-7.747	0.408	1.875	0.527-6.675	0.332
Adjuvant therapy
No	12 (48%)	Ref			Ref			Ref			Ref
Yes	13 (52%)	3.543	0.738-17.009	0.114	5.667	1.240-25.907	0.025	3.346	0.693-16.152	0.133	5.214	1.140-23.849	0.033
UDC detected
No	7 (28%)	Ref			Ref			Ref			Ref
Yes	18 (72%)	1.087	0.268-4.408	0.908	1.43	0.385-5.307	0.593	1.231	0.304-4.977	0.771	1.74	0.459-6.594	0.415
PanIN
0/I	10 (40%)	Ref			Ref			Ref			Ref
II/III	15 (60%)	1.728	0.436-6.850	0.436	0.885	0.281-2.794	0.835	1.627	0.410-6.453	0.488	0.856	0.271-2.702	0.791
Any mutation
No	14 (56%)	Ref			Ref			Ref			Ref
Yes	11 (44%)	2.053	0.522-8.080	0.303	1.331	0.429-4.133	0.621	2.128	0.540-8.384	0.28	1.448	0.464-4.517	0.524
KRAS
No	16 (64%)	Ref			Ref			Ref			Ref
Yes	9 (36%)	1.624	0.468-5.638	0.445	0.84	0.252-2.794	0.776	1.868	0.540-6.460	0.323	0.942	0.283-3.135	0.922
TP53
No	21 (84%)	Ref			Ref			Ref			Ref
Yes	4 (16%)	2.965	0.737-11.935	0.126	2.577	0.664-9.995	0.171	3.596	0.855-15.130	0.081	2.889	0.739-11.302	0.127
GNAS
No	20 (80%)	Ref			Ref			Ref			Ref
Yes	5 (20%)	1.755	0.489-6.303	0.389	2.64	0.743-9.383	0.134	1.676	0.466-6.033	0.429	2.752	0.766-9.881	0.121
SMAD4
No	22 (88%)	Ref			Ref			Ref			Ref
Yes	3 (12%)	1.244	0.251-6.160	0.789	1.285	0.281-5.877	0.746	1.299	0.265-6.369	0.747	1.095	0.239-5.019	0.907
TP53 or SMAD4
No	20 (80%)	Ref			Ref			Ref			Ref
Yes	5 (20%)	1.766	0.437-7.136	0.425	1.459	0.393-5.416	0.573	1.897	0.472-7.629	0.367	1.441	1.389-5.332	0.584
